# Supplementary material
Source: publisher figshare collection journal article supplement (https://sage.figshare.com/ndownloader/files/14441399)
Supplement: Supplementary file 1 [file 14441399]

# The Decline in Earnings of Childhood Immigrants in the United States: Online Appendix

# Robustness Checks

This section describes a number of robustness checks performed.

One potential issue with applying the Borjas (1985) methodology to childhood immigrants is that earlier cohorts appear more times than more recent cohorts (i.e., the 1965-69 arrival cohort appears in all samples (four times) while the 1995-99 cohort appears only in the 2010 sample). Furthermore, cohorts change significantly over time - in particular the longer the cohort is in the sample, the lower its mean age at migration becomes. Although the specification in Table 4 controls for age at migration, the change in cohort composition may pose a problem for the analysis. To address this concern, I include as a robustness check in the Table WA11 results from the main estimation (i.e., column 1 of Table 4) repeated by maximum *years since migration* group, which means that each cohort is included in the sample the same number of times and, thus, that the cohorts are treated symmetrically. I continue to find negative cohort effects for childhood immigrants arriving to the United States after the 1960s.

I explore whether the observed negative cohort effects are driven by Mexico, which is the notable outlier when considering recent immigration to the United States. I repeat the main specification from Table 4, but for samples with and without Mexico. Results are shown in web appendix Table WA18. Both sets of results show negative cohort effects, suggesting that Mexican immigration alone cannot explain the declining cohort effects.

I repeat the results from Table 7, using other measures of parental educational attainment than at least some college: at least a high school graduate (Table WA19) and at least a college graduate (Table WA20). I find that these alternate measures of parental education leave a larger portion of the negative cohort effects in childhood immigrants’ earnings and educational attainment unexplained, compared to measuring parental education using at least some college. One interpretation of these results is that measuring parental educational attainment using those with at least some college better captures the parental cohort’s overall level of educational attainment than using either at least a high-school graduate or at least a college graduate. Nevertheless, with any of the three measures considered, parental educational attainment is highly relevant in explaining the negative cohort effects in earnings, educational attainment, and English proficiency for childhood immigrants.

The sending country’s characteristics may impact childhood immigrants’ performance in ways not fully captured by controlling for parental skills. I explore this possibility by introducing controls for the log of the source country’s real GDP per capita at the time of migration in the specification from Table 7. Here I use the detailed birthplace codes, as opposed to the general code used in the main results, to better match immigrants to their source country's GDP. Since the detailed birthplace codes changed significantly after the 1970 Census, this analysis excludes the cohorts who arrived during the 1960s since their parental skills are measured using the 1970 Census.[[1]](#footnote-1) I also measure parental skills based on their detailed country code. The results are shown in Table WA21. I find that when also controlling for parental skills, the log of the sending country’s per capita GDP has no relationship with childhood immigrants’ earnings or English proficiency and only a small, negative relationship with educational attainment exists. Overall, these results suggest that any effects of source-country characteristics, at least as measured through GDP per capita, on childhood immigrants’ outcomes are well captured by the parental cohort’s skills.

It may be that adult immigrants from larger cohorts fare worse than those from smaller cohorts, due to higher competition with immigrants from the same country who are close substitutes in the labor market. I test this possibility by measuring the log of the parental cohort’s size and introducing this value as an explanatory variable. Results are shown in Table WA22. I do find evidence that childhood immigrants from larger parental cohorts fare worse (lower earnings, educational attainment, and English proficiency) than those from smaller cohorts, although the majority of this relationship is captured through parental earnings and education controls. Interestingly, the parental cohort’s size continues to have a meaningfully strong relationship with childhood immigrant English proficiency, even when controlling for parental earnings and educational attainment. This result is consistent with Borjas (2015), who finds that adult immigrants from larger national-origin groups experienced slower improvements in English language proficiency with time since migration.

One concern with measuring parental skill using the Census is that, because I group parents by arrival decade, a number of years may pass between when an adult immigrant arrives and when his/her skill is measured. Thus, there is a possibility of “upskilling.” To explore whether my results are sensitive to this issue, I measure parental skills based on half-decade arrival cohorts and consider only immigrants who arrived during the cohorts immediately before a Census when parental skills are measured. In other words, I include only the 1965-69, 1975-79, 1985-89, and 1995-99 arrival cohorts. Now, I am measuring parental skills closer to their US arrival, thus reducing the potential for upskilling. I repeat the results from Table 7, using this different set of cohorts and measures of parental skills. These results are shown in Table WA23. While the parental-skill variables are slightly greater in magnitude relative to the results in Table 7, which is consistent with a closer match between parental and childhood immigrant cohorts, qualitatively, the results are the same.

My measure of parental skills included all adult immigrants from a particular birthplace who arrived during a given cohort. This measure includes adult immigrants who arrived with and without children. As a robustness check, I include as an alternate measure of parental skills only adult immigrants who had a child in the household born abroad. This approach eliminates adult immigrants who arrived without children but also excludes adult immigrants whose children left the household in the intervening years between their US arrival and measurement in the Census. I reduce the scope of this latter problem by following the same procedure described above (Table WA23) and including only the cohorts who arrived in the half-decades immediately before a Census, which reduces the number of years between arrival and measurement and thus the potential for children to have left the house. I repeat the estimation from Table 7, with results shown in Table WA24. Relative to the previous results from Table WA23, the results are largely unchanged. Also note, however, that parental skills are meant to capture both the potential parents of childhood immigrants and a more general “neighborhood effect,” which would support including a wider group of adult immigrants from the same birthplace-cohort.

Since my previous definition of parental cohorts includes only parents, I also measure the number of children in the household, since immigrants may differ by birthplace and over time in their family size, which may lead to differences in investment decisions in their children. This measure is then included as a parental “skill,” like earnings and education, in Table WA25. While there is a strong, negative relationship between the number of children and all three childhood-immigrant outcome measures (earnings, educational attainment, and English language ability), controlling for the main measures of parental skills (earnings and educational attainment) eliminates the relationship for the earnings and educational attainment of childhood immigrants. A negative relationship persists, however, for English language ability, although is greatly reduced in magnitude.

Finally, I consider whether geographic region can explain the declining cohort effects by introducing state of residence into the controls in the baseline results from Tables 4 and 5. Results are shown in Table WA26. I find that only a small portion, typically up to 1-2 percentage points, of the cohort effects in earnings, educational attainment, and English proficiency can be explained by controlling for state of residence. It is important to note, however, that geographic location is (to some extent at least) a choice made by individuals; thus, even if a large portion of the negative cohort effects were explained by the state of residence, it should not be concluded that negative cohort effects do not exist. Rather, they are mediated to some extent through the choice of the state of residence. Regardless, my results find little role for geographic region in explaining the negative cohort effects.

# Additional Tables

Table WA1: Descriptive Statistics, Alternate Cohorts

|  | (1) | (2) | (3) | (4) |
| --- | --- | --- | --- | --- |
|  | 1980 | 1990 | 2000 | 2010 |
| Natives |  |  |  |  |
|  |  |  |  |  |
| Age | 41.19 | 40.66 | 42.27 | 43.75 |
|  | (11.13) | (10.41) | (10.01) | (10.73) |
|  |  |  |  |  |
| Years Educ. | 12.57 | 13.19 | 13.45 | 13.67 |
|  | (3.32) | (2.71) | (2.51) | (2.47) |
|  |  |  |  |  |
| Some College+ | 0.42 | 0.54 | 0.59 | 0.63 |
|  | (0.49) | (0.50) | (0.49) | (0.48) |
|  |  |  |  |  |
| Weekly Income | 1,181.38 | 1,213.77 | 1,328.23 | 1,241.81 |
|  | (892.81) | (1,201.23) | (1,611.94) | (1,364.77) |
|  |  |  |  |  |
| 16-20 YSM |  |  |  |  |
|  |  |  |  |  |
| Age | 29.11 | 29.48 | 29.87 | 29.61 |
|  | (2.60) | (2.65) | (2.56) | (2.56) |
|  |  |  |  |  |
| Age at Migration | 13.11 | 13.48 | 13.87 | 13.61 |
|  | (2.60) | (2.65) | (2.56) | (2.56) |
|  |  |  |  |  |
| Years Educ. | 12.57 | 11.52 | 11.29 | 11.87 |
|  | (3.67) | (3.95) | (4.07) | (3.59) |
|  |  |  |  |  |
| Some College+ | 0.50 | 0.41 | 0.38 | 0.41 |
|  | (0.50) | (0.49) | (0.48) | (0.49) |
|  |  |  |  |  |
| Weekly Income | 980.05 | 894.76 | 895.66 | 743.44 |
|  | (653.27) | (824.83) | (1,007.25) | (683.45) |
|  |  |  |  |  |
| 26-30 YSM |  |  |  |  |
|  |  |  |  |  |
| Age |  | 34.62 | 35.93 | 36.53 |
|  |  | (5.01) | (4.87) | (4.87) |
|  |  |  |  |  |
| Age at Migration |  | 8.62 | 9.93 | 10.53 |
|  |  | (5.01) | (4.87) | (4.87) |
|  |  |  |  |  |
| Years Educ. |  | 13.13 | 12.26 | 12.47 |
|  |  | (3.28) | (3.84) | (3.73) |
|  |  |  |  |  |
| Some College+ |  | 0.60 | 0.50 | 0.52 |
|  |  | (0.49) | (0.50) | (0.50) |
|  |  |  |  |  |
| Weekly Income |  | 1,251.87 | 1,184.15 | 1,067.41 |
|  |  | (1,159.20) | (1,347.64) | (1,099.15) |
| Observations | 2,028,052 | 2,326,927 | 2,528,054 | 1,528,936 |

Notes: Income measured in 2010 dollars. Sources: 1980, 1990, and 2000 Census and 2009-2011 ACS.

Table WA2: Log Weekly Earnings Gap, by Cohort and Years Since Migration, Alternate Cohorts

|  | (1) | (2) | (3) | (4) |
| --- | --- | --- | --- | --- |
|  | 16-20 | 26-30 | 36-40 | 46-50 |
| 1960-1964 | -0.011 | 0.091 | 0.054 | 0.074 |
|  | (0.012) | (0.008) | (0.010) | (0.015) |
|  |  |  |  |  |
| 1970-1974 | -0.052 | -0.050 | -0.054 |  |
|  | (0.009) | (0.007) | (0.010) |  |
|  |  |  |  |  |
| 1980-1984 | -0.137 | -0.087 |  |  |
|  | (0.006) | (0.008) |  |  |
|  |  |  |  |  |
| 1990-1994 | -0.167 |  |  |  |
|  | (0.009) |  |  |  |

Notes: Table shows the age-adjusted log weekly earnings gap of childhood immigrants relative to natives, separately by cohort and years since migration. Standard error of the mean shown in parentheses. Sources: 1980, 1990, and 2000 Census and 2009-2011 ACS.

Table WA3: Log Weekly Earnings Gap, by Age at Migration(0-13)-Cohort and Years Since Migration, Alternate Cohorts

|  | Years Since Migration | | |  |
| --- | --- | --- | --- | --- |
|  | (1) | (2) | (3) | (4) |
|  | 16-20 | 26-30 | 36-40 | 46-50 |
| Age at Migration: 0-3 | |  |  |  |
|  |  |  |  |  |
| 1960-1964 |  | 0.100 | 0.097 | 0.151 |
|  |  | (0.017) | (0.023) | (0.033) |
|  |  |  |  |  |
| 1970-1974 |  | 0.031 | 0.059 |  |
|  |  | (0.017) | (0.025) |  |
|  |  |  |  |  |
| 1980-1984 |  | 0.006 |  |  |
|  |  | (0.021) |  |  |
|  |  |  |  |  |
| Age at Migration: 4-8 | |  |  |  |
| 1960-1964 |  | 0.111 | 0.076 | 0.062 |
|  |  | (0.014) | (0.016) | (0.025) |
|  |  |  |  |  |
| 1970-1974 |  | 0.038 | 0.056 |  |
|  |  | (0.012) | (0.020) |  |
|  |  |  |  |  |
| 1980-1984 |  | -0.010 |  |  |
|  |  | (0.016) |  |  |
|  |  |  |  |  |
| Age at Migration: 9-13 | |  |  |  |
| 1960-1964 |  | -0.000 | 0.097 | 0.020 |
|  |  | (0.015) | (0.016) | (0.019) |
|  |  |  |  |  |
| 1970-1974 |  | 0.004 | -0.026 | -0.099 |
|  |  | (0.012) | (0.013) | (0.019) |
|  |  |  |  |  |
| 1980-1984 |  | -0.079 | -0.009 |  |
|  |  | (0.010) | (0.015) |  |

Notes: Table shows the age-adjusted log weekly earnings gap of childhood immigrants relative to natives, separately by age at migration-cohort and years since migration. Standard error of the mean shown in parentheses. Sources: 1980, 1990, and 2000 Census and 2009-2011 ACS.

Table WA4: Log Weekly Earnings Gap, by Age at Migration(14-17)-Cohort and Years Since Migration, Alternate Cohorts

|  | Years Since Migration | | | |
| --- | --- | --- | --- | --- |
|  | (1) | (2) | (3) | (4) |
|  | 16-20 | 26-30 | 36-40 | 46-50 |
| Age at Migration: 14-15 | | | | |
| 1960-1964 | -0.003 | 0.038 | 0.034 | 0.065 |
|  | (0.026) | (0.028) | (0.031) | (0.046) |
|  |  |  |  |  |
| 1970-1974 | -0.076 | -0.137 | -0.185 |  |
|  | (0.018) | (0.019) | (0.029) |  |
|  |  |  |  |  |
| 1980-1984 | -0.139 | -0.160 |  |  |
|  | (0.012) | (0.021) |  |  |
|  |  |  |  |  |
| 1990-1994 | -0.182 |  |  |  |
|  | (0.016) |  |  |  |
|  |  |  |  |  |
| Age at Migration: 16-17 | | | | |
| 1960-1964 | -0.044 | 0.054 | 0.026 | 0.102 |
|  | (0.025) | (0.025) | (0.030) | (0.044) |
|  |  |  |  |  |
| 1970-1974 | -0.123 | -0.223 | -0.172 |  |
|  | (0.016) | (0.017) | (0.024) |  |
|  |  |  |  |  |
| 1980-1984 | -0.203 | -0.280 |  |  |
|  | (0.011) | (0.017) |  |  |
|  |  |  |  |  |
| 1990-1994 | -0.263 |  |  |  |
|  | (0.015) |  |  |  |

Notes: Table shows the age-adjusted log weekly earnings gap of childhood immigrants relative to natives, separately by age at migration-cohort and years since migration. Standard error of the mean shown in parentheses. Sources: 1980, 1990, and 2000 Census and 2009-2011 ACS.

Table WA5: Some College+ Gap, by Cohort and Years Since Migration

|  | Years Since Migration | | | |
| --- | --- | --- | --- | --- |
|  | (1) | (2) | (3) | (4) |
|  | 11-15 | 21-25 | 31-35 | 41-45 |
| 1965-1969 | -0.159 | -0.038 | -0.033 | -0.035 |
|  | (0.010) | (0.006) | (0.005) | (0.007) |
|  |  |  |  |  |
| 1975-1979 | -0.125 | -0.087 | -0.054 |  |
|  | (0.007) | (0.004) | (0.005) |  |
|  |  |  |  |  |
| 1985-1989 | -0.319 | -0.164 |  |  |
|  | (0.005) | (0.005) |  |  |
|  |  |  |  |  |
| 1995-1999 | -0.330 |  |  |  |
|  | (0.007) |  |  |  |

Notes: Table shows the age-adjusted fraction childhood immigrants who have at least some college education relative to natives, separately by cohort and years since migration. Standard error of the mean shown in parentheses. Sources: 1980, 1990, and 2000 Census and 2009-2011 ACS.

Table WA6: Some College+ Gap, by Age at Migration(0-13)-Cohort and Years Since Migration,

|  | Years Since Migration | | | | | |  |
| --- | --- | --- | --- | --- | --- | --- | --- |
|  | (1) | | (2) | | (3) | | (4) |
|  | 11-15 | | 21-25 | | 31-35 | | 41-45 |
| Age at Migration: 0-3 | | | | | | |  |
| 1965-1969 |  | |  | | 0.026 | | 0.020 |
|  |  | |  | | (0.013) | | (0.017) |
|  |  | |  | |  | |  |
| 1975-1979 |  | |  | | -0.032 | |  |
|  |  | |  | | (0.015) | |  |
|  |  | |  | |  | |  |
| Age at Migration: 4-8 | | | | | | |  |
| 1965-1969 |  | | 0.055 | | 0.046 | | 0.028 |
|  |  | | (0.010) | | (0.009) | | (0.012) |
|  |  | |  | |  | |  |
| 1975-1979 |  | | -0.018 | | 0.033 | |  |
|  |  | | (0.008) | | (0.010) | |  |
|  |  | |  | |  | |  |
| 1985-1989 |  | | -0.071 | |  | |  |
|  |  | | (0.010) | |  | |  |
|  | |  | |  | |  |  |
| Age at Migration: 9-13 | | | | | | |  |
| 1965-1969 |  | | -0.028 | | -0.038 | | -0.037 |
|  |  | | (0.010) | | (0.010) | | (0.013) |
|  |  | |  | |  | |  |
| 1975-1979 |  | | -0.044 | | -0.034 | |  |
|  |  | | (0.007) | | (0.010) | |  |
|  |  | |  | |  | |  |
| 1985-1989 |  | | -0.111 | |  | |  |
|  |  | | (0.009) | |  | |  |

Notes: Table shows the age-adjusted fraction childhood immigrants who have at least some college education relative to natives, separately by cohort and years since migration. Standard error of the mean shown in parentheses. Sources: 1980, 1990, and 2000 Census and 2009-2011 ACS.

Table WA7: Some College+ Gap, by Age at Migration(14-17)-Cohort and Years Since Migration

|  | Years Since Migration | | | |
| --- | --- | --- | --- | --- |
|  | (1) | (2) | (3) | (4) |
|  | 11-15 | 21-25 | 31-35 | 41-45 |
| Age at Migration: 14-15 | | | | |
| 1965-1969 | -0.136 | -0.123 | -0.127 | -0.135 |
|  | (0.015) | (0.015) | (0.015) | (0.021) |
|  |  |  |  |  |
| 1975-1979 | -0.086 | -0.119 | -0.130 |  |
|  | (0.011) | (0.010) | (0.014) |  |
|  |  |  |  |  |
| 1985-1989 | -0.291 | -0.218 |  |  |
|  | (0.008) | (0.012) |  |  |
|  |  |  |  |  |
| 1995-1999 | -0.289 |  |  |  |
|  | (0.011) |  |  |  |
|  |  |  |  |  |
| Age at Migration: 16-17 | | | | |
| 1965-1969 | -0.179 | -0.204 | -0.215 | -0.200 |
|  | (0.013) | (0.015) | (0.014) | (0.020) |
|  |  |  |  |  |
| 1975-1979 | -0.152 | -0.211 | -0.182 |  |
|  | (0.009) | (0.008) | (0.012) |  |
|  |  |  |  |  |
| 1985-1989 | -0.336 | -0.304 |  |  |
|  | (0.006) | (0.010) |  |  |
|  |  |  |  |  |
| 1995-1999 | -0.358 |  |  |  |
|  | (0.009) |  |  |  |

Notes: Table shows the age-adjusted fraction childhood immigrants who have at least some college education relative to natives, separately by cohort and years since migration. Standard error of the mean shown in parentheses. Sources: 1980, 1990, and 2000 Census and 2009-2011 ACS.

Table WA8: Speak English Very Well+, by Cohort and Years Since Migration

|  | Years Since Migration | | | |
| --- | --- | --- | --- | --- |
|  | (1) | (2) | (3) | (4) |
|  | 11-15 | 21-25 | 31-35 | 41-45 |
| 1965-1969 | 0.536 | 0.797 | 0.814 | 0.816 |
|  | (0.010) | (0.005) | (0.004) | (0.005) |
|  |  |  |  |  |
| 1975-1979 | 0.514 | 0.694 | 0.747 |  |
|  | (0.008) | (0.004) | (0.005) |  |
|  |  |  |  |  |
| 1985-1989 | 0.429 | 0.663 |  |  |
|  | (0.005) | (0.005) |  |  |
|  |  |  |  |  |
| 1995-1999 | 0.450 |  |  |  |
|  | (0.008) |  |  |  |

Notes: Table shows the fraction of childhood immigrants who report speaking English very well or only English, separately by cohort and years since migration. Standard error of the mean shown in parentheses. Sources: 1980, 1990, and 2000 Census and 2009-2011 ACS.

Table WA9: Speak English Very Well+, by Age at Migration(0-13)-Cohort and Years Since Migration

|  | Years Since Migration | | | | | |  |
| --- | --- | --- | --- | --- | --- | --- | --- |
|  | (1) | | (2) | | (3) | | (4) |
|  | 11-15 | | 21-25 | | 31-35 | | 41-45 |
| Age at Migration: 0-3 | | | | | | |  |
| 1965-1969 |  | |  | | 0.889 | | 0.890 |
|  |  | |  | | (0.009) | | (0.011) |
|  |  | |  | |  | |  |
| 1975-1979 |  | |  | | 0.839 | |  |
|  |  | |  | | (0.011) | |  |
|  |  | |  | |  | |  |
| Age at Migration: 4-8 | | | | | | |  |
| 1965-1969 |  | | 0.888 | | 0.896 | | 0.875 |
|  |  | | (0.006) | | (0.005) | | (0.008) |
|  |  | |  | |  | |  |
| 1975-1979 |  | | 0.843 | | 0.865 | |  |
|  |  | | (0.006) | | (0.007) | |  |
|  |  | |  | |  | |  |
| 1985-1989 |  | | 0.804 | |  | |  |
|  |  | | (0.008) | |  | |  |
|  | |  | |  | |  |  |
| Age at Migration: 9-13 | | | | | | |  |
| 1965-1969 |  | | 0.818 | | 0.822 | | 0.817 |
|  |  | | (0.008) | | (0.007) | | (0.010) |
|  |  | |  | |  | |  |
| 1975-1979 |  | | 0.751 | | 0.778 | |  |
|  |  | | (0.006) | | (0.008) | |  |
|  |  | |  | |  | |  |
| 1985-1989 |  | | 0.735 | |  | |  |
|  |  | | (0.008) | |  | |  |

Notes: Table shows the fraction of childhood immigrants who report speaking English very well or only English, separately by cohort and years since migration. Standard error of the mean shown in parentheses. Sources: 1980, 1990, and 2000 Census and 2009-2011 ACS.

Table WA10: Speak English Very Well+, by Age at Migration(14-17)-Cohort and Years Since Migration

|  | Years Since Migration | | | |
| --- | --- | --- | --- | --- |
|  | (1) | (2) | (3) | (4) |
|  | 11-15 | 21-25 | 31-35 | 41-45 |
| Age at Migration: 14-15 | | | | |
| 1965-1969 | 0.597 | 0.703 | 0.678 | 0.702 |
|  | (0.015) | (0.014) | (0.014) | (0.019) |
|  |  |  |  |  |
| 1975-1979 | 0.571 | 0.603 | 0.627 |  |
|  | (0.012) | (0.010) | (0.014) |  |
|  |  |  |  |  |
| 1985-1989 | 0.501 | 0.577 |  |  |
|  | (0.009) | (0.012) |  |  |
|  |  |  |  |  |
| 1995-1999 | 0.501 |  |  |  |
|  | (0.012) |  |  |  |
|  |  |  |  |  |
| Age at Migration: 16-17 | | | | |
| 1965-1969 | 0.485 | 0.619 | 0.614 | 0.644 |
|  | (0.014) | (0.015) | (0.014) | (0.019) |
|  |  |  |  |  |
| 1975-1979 | 0.475 | 0.495 | 0.537 |  |
|  | (0.010) | (0.009) | (0.012) |  |
|  |  |  |  |  |
| 1985-1989 | 0.386 | 0.465 |  |  |
|  | (0.007) | (0.010) |  |  |
|  |  |  |  |  |
| 1995-1999 | 0.414 |  |  |  |
|  | (0.010) |  |  |  |

Notes: Table shows the fraction of childhood immigrants who report speaking English very well or only English, separately by cohort and years since migration. Standard error of the mean shown in parentheses. Sources: 1980, 1990, and 2000 Census and 2009-2011 ACS.

Table WA11: OLS Regressions, Log Weekly Earnings, by Maximum Years Since Migration

|  | (1) | (2) | (3) | (4) |
| --- | --- | --- | --- | --- |
|  | 46-50 | 36-40 | 26-30 | 16-20 |
| Cohort: |  |  |  |  |
|  |  |  |  |  |
| 1960-1964 | 0.059*** | 0.053*** | 0.038** | 0.024* |
|  | (0.001) | (0.002) | (0.007) | (0.008) |
|  |  |  |  |  |
| 1970-1974 |  | -0.041*** | -0.053*** | -0.009 |
|  |  | (0.003) | (0.008) | (0.007) |
|  |  |  |  |  |
| 1975-1979 |  | -0.031*** | -0.046*** | 0.006*** |
|  |  | (0.002) | (0.002) | (0.001) |
|  |  |  |  |  |
| 1980-1984 |  |  | -0.098*** | -0.086*** |
|  |  |  | (0.008) | (0.006) |
|  |  |  |  |  |
| 1985-1989 |  |  | -0.141*** | -0.107*** |
|  |  |  | (0.002) | (0.001) |
|  |  |  |  |  |
| 1990-1994 |  |  |  | -0.121*** |
|  |  |  |  | (0.007) |
|  |  |  |  |  |
| 1995-1999 |  |  |  | -0.128*** |
|  |  |  |  | (0.001) |
|  |  |  |  |  |
| Age at Migration: |  |  |  |  |
|  |  |  |  |  |
| 0-3 | 0.080* | 0.080** | 0.042* |  |
|  | (0.012) | (0.014) | (0.013) |  |
|  |  |  |  |  |
| 4-8 | 0.057* | 0.079*** | 0.038** |  |
|  | (0.012) | (0.009) | (0.008) |  |
|  |  |  |  |  |
| 14-15 | -0.059 | -0.069* | -0.095*** | -0.070** |
|  | (0.046) | (0.017) | (0.016) | (0.014) |
|  |  |  |  |  |
| 16-17 | -0.068 | -0.119** | -0.164*** | -0.132*** |
|  | (0.050) | (0.023) | (0.020) | (0.017) |
| Observations | 8,397,268 | 8,442,115 | 8,451,106 | 8,400,369 |
| R­2 | 0.038 | 0.038 | 0.039 | 0.040 |

Notes: Dependent variable is log weekly earnings in 2010 dollars. Each column includes natives and immigrants with years since migration up to and including the value listed. Omitted category are 1965-69 cohort and 9-13 age at migration. All specifications include survey year, an immigrant dummy variable, age (introduced as a third-order polynomial) and fully interacted with survey year, years since migration, years since migration squared, and a constant. Year since migration omitted from column (4), since each cohort only observed as a single years since migration value. Sources: 1980, 1990, and 2000 Census and 2009-2011 ACS. Standard errors in parentheses, and are clustered at the immigrant cohort level.

Table WA12: OLS Regressions, Log Weekly Earnings, No YSM

|  | (1) | (2) | (3) | (4) | (5) | (6) |
| --- | --- | --- | --- | --- | --- | --- |
| Cohort: |  |  |  |  |  |  |
|  |  |  |  |  |  |  |
| 1960-1964 | 0.039** | 0.021* | 0.009 | 0.024** | 0.004 | -0.003 |
|  | (0.008) | (0.008) | (0.006) | (0.006) | (0.006) | (0.006) |
|  |  |  |  |  |  |  |
| 1970-1974 | -0.048*** | -0.001 | -0.024*** | -0.029** | -0.017** | 0.002 |
|  | (0.008) | (0.010) | (0.005) | (0.006) | (0.005) | (0.007) |
|  |  |  |  |  |  |  |
| 1975-1979 | -0.049** | -0.001 | -0.030* | -0.012 | -0.018 | 0.008 |
|  | (0.015) | (0.020) | (0.010) | (0.011) | (0.010) | (0.012) |
|  |  |  |  |  |  |  |
| 1980-1984 | -0.122*** | -0.049 | -0.057** | -0.055** | -0.034* | -0.000 |
|  | (0.021) | (0.026) | (0.013) | (0.016) | (0.013) | (0.015) |
|  |  |  |  |  |  |  |
| 1985-1989 | -0.180*** | -0.079* | -0.085** | -0.093** | -0.054* | -0.017 |
|  | (0.025) | (0.031) | (0.018) | (0.019) | (0.018) | (0.019) |
|  |  |  |  |  |  |  |
| 1990-1994 | -0.190*** | -0.096* | -0.099** | -0.094** | -0.064* | -0.031 |
|  | (0.030) | (0.037) | (0.021) | (0.024) | (0.021) | (0.022) |
|  |  |  |  |  |  |  |
| 1995-1999 | -0.186*** | -0.083 | -0.080* | -0.063* | -0.034 | -0.002 |
|  | (0.030) | (0.037) | (0.026) | (0.026) | (0.027) | (0.026) |
|  |  |  |  |  |  |  |
| Age at Migration: |  |  |  |  |  |  |
|  |  |  |  |  |  |  |
| 4-8 | 0.003 | -0.016 | -0.006 | 0.004 | -0.006 | -0.012 |
|  | (0.014) | (0.013) | (0.010) | (0.010) | (0.008) | (0.010) |
|  |  |  |  |  |  |  |
| 9-13 | -0.041 | -0.055* | -0.027 | -0.015 | -0.018 | -0.025 |
|  | (0.020) | (0.022) | (0.015) | (0.017) | (0.014) | (0.016) |
|  |  |  |  |  |  |  |
| 14-15 | -0.118** | -0.101** | -0.040 | -0.034 | -0.011 | -0.017 |
|  | (0.027) | (0.030) | (0.018) | (0.024) | (0.017) | (0.019) |
|  |  |  |  |  |  |  |
| 16-17 | -0.179*** | -0.131** | -0.058* | -0.057* | -0.016 | -0.020 |
|  | (0.028) | (0.031) | (0.019) | (0.025) | (0.018) | (0.019) |
|  |  |  |  |  |  |  |
| Birthplace | No | Yes | No | No | No | Yes |
|  |  |  |  |  |  |  |
| Education | No | No | Yes | No | Yes | Yes |
|  |  |  |  |  |  |  |
| English | No | No | No | Yes | Yes | Yes |
| Observations | 8,503,867 | 8,503,867 | 8,503,867 | 8,503,867 | 8,503,867 | 8,503,867 |
| R­2 | 0.040 | 0.042 | 0.155 | 0.041 | 0.156 | 0.156 |

Notes: Dependent variable is log weekly earnings in 2010 dollars. Omitted categories are 1965-69 cohort and 0-3 age at migration. Birthplace measured using detailed Census code, and both education and English proficiency using dummy variables with five groups each. All specifications include survey year, an immigrant dummy variable, age (introduced as a third-order polynomial) and fully interacted with survey year as well as immigrant status, and a constant. Sources: 1980, 1990, and 2000 Census and 2009-2011 ACS. Standard errors in parentheses, and are clustered at the immigrant cohort level.

Table WA13: Linear Probability Models, Educational Attainment and English Proficiency, Alternate Measures

|  | High School Grad+ | | College Grad+ | | English Well+ | |
| --- | --- | --- | --- | --- | --- | --- |
|  | (1) | (2) | (3) | (4) | (5) | (6) |
| Cohort: |  |  |  |  |  |  |
|  |  |  |  |  |  |  |
| 1960-1964 | 0.042*** | 0.023*** | 0.034*** | 0.021*** | 0.019*** | 0.013*** |
|  | (0.001) | (0.002) | (0.001) | (0.003) | (0.001) | (0.001) |
|  |  |  |  |  |  |  |
| 1970-1974 | -0.039*** | 0.000 | -0.001 | 0.015*** | -0.024*** | -0.000 |
|  | (0.002) | (0.003) | (0.002) | (0.003) | (0.001) | (0.002) |
|  |  |  |  |  |  |  |
| 1975-1979 | -0.035*** | 0.002 | 0.033*** | 0.030*** | -0.035*** | -0.008* |
|  | (0.002) | (0.005) | (0.002) | (0.005) | (0.001) | (0.003) |
|  |  |  |  |  |  |  |
| 1980-1984 | -0.050*** | -0.008 | -0.016** | -0.004 | -0.065*** | -0.035*** |
|  | (0.003) | (0.006) | (0.003) | (0.004) | (0.001) | (0.003) |
|  |  |  |  |  |  |  |
| 1985-1989 | -0.049*** | 0.016* | -0.053*** | -0.022** | -0.083*** | -0.041*** |
|  | (0.004) | (0.006) | (0.003) | (0.005) | (0.004) | (0.005) |
|  |  |  |  |  |  |  |
| 1990-1994 | -0.017** | 0.043*** | -0.045*** | -0.025*** | -0.080*** | -0.040*** |
|  | (0.004) | (0.006) | (0.004) | (0.005) | (0.004) | (0.005) |
|  |  |  |  |  |  |  |
| 1995-1999 | -0.018 | 0.048*** | -0.065*** | -0.037*** | -0.133*** | -0.090*** |
|  | (0.010) | (0.007) | (0.006) | (0.006) | (0.012) | (0.011) |
|  |  |  |  |  |  |  |
| Age at Migration: |  |  |  |  |  |  |
|  |  |  |  |  |  |  |
| 4-8 | 0.001 | -0.017* | 0.002 | -0.005 | 0.000 | -0.010 |
|  | (0.005) | (0.007) | (0.006) | (0.004) | (0.005) | (0.005) |
|  |  |  |  |  |  |  |
| 9-13 | -0.044*** | -0.061*** | -0.028 | -0.030* | -0.011 | -0.021* |
|  | (0.006) | (0.010) | (0.013) | (0.010) | (0.006) | (0.008) |
|  |  |  |  |  |  |  |
| 14-15 | -0.151*** | -0.140*** | -0.087*** | -0.067*** | -0.074*** | -0.069*** |
|  | (0.012) | (0.014) | (0.015) | (0.013) | (0.010) | (0.010) |
|  |  |  |  |  |  |  |
| 16-17 | -0.233*** | -0.194*** | -0.122*** | -0.078*** | -0.126*** | -0.108*** |
|  | (0.016) | (0.016) | (0.014) | (0.012) | (0.013) | (0.011) |
|  |  |  |  |  |  |  |
| Birthplace | No | Yes | No | Yes | No | Yes |
| Mean | 0.873 | 0.873 | 0.276 | 0.276 | 0.876 | 0.876 |
| Observations | 8,503,867 | 8,503,867 | 8,503,867 | 8,503,867 | 152,693 | 152,693 |
| R­2 | 0.076 | 0.082 | 0.012 | 0.016 | 0.059 | 0.147 |

Notes: Dependent variable for all columns is binary, and equals one if the worker is at least a high school graduate and zero otherwise (columns 1-2), equals one if the worker is at least a college graduate and zero otherwise (columns 3-4), and equals one if the worker reports speaking English at least well and zero otherwise (columns 5-6). Omitted categories are 1965-69 cohort and 0-3 age at migration. Birthplace measured using detailed Census code. All specifications include years since migration, years since migration squared, and a constant; columns (1-4) include survey year, age (introduced as a third-order polynomial) and fully interacted with survey year, and an immigrant dummy variable. Row “Mean” shows the mean of the dependent variable. Sources: 1980, 1990, and 2000 Census and 2009-2011 ACS. Standard errors in parentheses, and are clustered at the immigrant cohort level.

Table WA14: Ordered Logit Model, Educational Attainment and English Language Proficiency

|  | Education | | English Proficiency | |
| --- | --- | --- | --- | --- |
|  | (1) | (2) | (3) | (4) |
| Cohort: |  |  |  |  |
|  |  |  |  |  |
| 1960-1964 | 0.242*** | 0.150*** | 0.316*** | 0.209*** |
|  | (0.006) | (0.016) | (0.002) | (0.007) |
|  |  |  |  |  |
| 1970-1974 | -0.130*** | 0.033* | -0.213*** | -0.006 |
|  | (0.009) | (0.016) | (0.006) | (0.009) |
|  |  |  |  |  |
| 1975-1979 | -0.024* | 0.066** | -0.326*** | -0.032 |
|  | (0.010) | (0.022) | (0.005) | (0.019) |
|  |  |  |  |  |
| 1980-1984 | -0.258*** | -0.103*** | -0.519*** | -0.201*** |
|  | (0.014) | (0.027) | (0.006) | (0.018) |
|  |  |  |  |  |
| 1985-1989 | -0.383*** | -0.102*** | -0.556*** | -0.170*** |
|  | (0.023) | (0.029) | (0.015) | (0.021) |
|  |  |  |  |  |
| 1990-1994 | -0.299*** | -0.048 | -0.554*** | -0.166*** |
|  | (0.025) | (0.027) | (0.014) | (0.018) |
|  |  |  |  |  |
| 1995-1999 | -0.365*** | -0.084* | -0.648*** | -0.257*** |
|  | (0.063) | (0.036) | (0.041) | (0.027) |
|  |  |  |  |  |
| Age at Migration: |  |  |  |  |
|  |  |  |  |  |
| 4-8 | 0.020 | -0.069*** | -0.117** | -0.229*** |
|  | (0.024) | (0.020) | (0.045) | (0.034) |
|  |  |  |  |  |
| 9-13 | -0.187*** | -0.278*** | -0.503*** | -0.694*** |
|  | (0.047) | (0.046) | (0.042) | (0.054) |
|  |  |  |  |  |
| 14-15 | -0.717*** | -0.650*** | -1.060*** | -1.225*** |
|  | (0.068) | (0.066) | (0.042) | (0.069) |
|  |  |  |  |  |
| 16-17 | -1.126*** | -0.866*** | -1.417*** | -1.504*** |
|  | (0.075) | (0.067) | (0.038) | (0.071) |
| cut1 |  |  |  |  |
| Constant | -1.633*** | -1.643*** | -4.154*** | -7.656*** |
|  | (0.014) | (0.003) | (0.126) | (0.159) |
| cut2 |  |  |  |  |
| Constant | 0.204*** | 0.206*** | -2.502*** | -5.913*** |
|  | (0.004) | (0.001) | (0.114) | (0.147) |
| cut3 |  |  |  |  |
| Constant | 1.380*** | 1.387*** | -1.241*** | -4.463*** |
|  | (0.005) | (0.003) | (0.097) | (0.146) |
| cut4 |  |  |  |  |
| Constant | 2.564*** | 2.575*** | 1.119*** | -1.278*** |
|  | (0.002) | (0.010) | (0.096) | (0.137) |
|  |  |  |  |  |
| Birthplace | No | Yes | No | Yes |
| Observations | 8,503,867 | 8,503,867 | 152,693 | 152,693 |

Notes: Dependent variable in columns (1-2) is educational attainment, and is categorical, taking values between 1 for high school dropout, and 5 for post college, and in columns (3-4) is English language proficiency, and is categorical, taking values between 1 for Does Not Speak English, and 5 for Speaks Only English. Omitted categories are 1965-69 cohort and 0-3 age at migration. Birthplace measured using detailed Census code. All specifications include years since migration, years since migration squared, and a constant, while columns (1-2) also include survey year, an immigrant dummy variable, and age (introduced as a third-order polynomial) and fully interacted with survey year. Sources: 1980, 1990, and 2000 Census and 2009-2011 ACS. Standard errors in parentheses, and are clustered at the immigrant cohort level.

Table WA15: Parental Skill Levels of Childhood Immigrants, by Cohort and Years Since Migration

| **Panel A: Log Weekly Earnings** | | | | |
| --- | --- | --- | --- | --- |
|  | Years Since Migration | | | |
|  | (1) | (2) | (3) | (4) |
|  | 11-15 | 21-25 | 31-35 | 41-45 |
| 1965-1969 | -0.314 | -0.264 | -0.258 | -0.264 |
|  |  |  |  |  |
| 1975-1979 | -0.455 | -0.418 | -0.408 |  |
|  |  |  |  |  |
| 1985-1989 | -0.568 | -0.506 |  |  |
|  |  |  |  |  |
| 1995-1999 | -0.482 |  |  |  |
| **Panel B: Some College+**   |  | Years Since Migration | | | | | --- | --- | --- | --- | --- | |  | (1) | (2) | (3) | (4) | |  | 11-15 | 21-25 | 31-35 | 41-45 | | 1965-1969 | -0.062 | -0.014 | -0.005 | -0.001 | |  |  |  |  |  | | 1975-1979 | -0.169 | -0.123 | -0.101 |  | |  |  |  |  |  | | 1985-1989 | -0.270 | -0.204 |  |  | |  |  |  |  |  | | 1995-1999 | -0.264 |  |  |  | | | | | |

Notes: Table shows the age-adjusted skill levels of the (potential) parents of childhood immigrants relative to natives, separately by cohort and years since migration. Panel A shows skills measured based on earnings, while panel B shows skills measured based on having at least some college education, both measured shortly after arrival. Sources: 1980, 1990, and 2000 Census and 2009-2011 ACS.

Table WA16: Parental Skill Levels of Childhood Immigrants, by Cohort and Age at Migration

| **Panel A: Log Weekly Earnings** | | | | | |
| --- | --- | --- | --- | --- | --- |
|  | Age at Migration | | | | |
|  | (1) | (2) | (3) | (4) | (5) |
|  | 0-3 | 4-8 | 9-13 | 14-15 | 16-17 |
| 1965-1969 | -0.234 | -0.231 | -0.262 | -0.295 | -0.331 |
|  |  |  |  |  |  |
| 1975-1979 | -0.406 | -0.390 | -0.401 | -0.440 | -0.464 |
|  |  |  |  |  |  |
| 1985-1989 |  | -0.484 | -0.476 | -0.549 | -0.580 |
|  |  |  |  |  |  |
| 1995-1999 |  |  |  | -0.471 | -0.490 |
| **Panel B: Some College+**   |  | Age at Migration | | | | | | --- | --- | --- | --- | --- | --- | |  | (1) | (2) | (3) | (4) | (5) | |  | 0-3 | 4-8 | 9-13 | 14-15 | 16-17 | | 1965-1969 | 0.022 | 0.015 | -0.015 | -0.053 | -0.070 | |  |  |  |  |  |  | | 1975-1979 | -0.107 | -0.096 | -0.103 | -0.152 | -0.181 | |  |  |  |  |  |  | | 1985-1989 |  | -0.181 | -0.178 | -0.249 | -0.282 | |  |  |  |  |  |  | | 1995-1999 |  |  |  | -0.252 | -0.272 | | | | | | |

Notes: Table shows the age-adjusted skill levels of the (potential) parents of childhood immigrants relative to natives, separately by cohort and age at migration group. Panel A shows skills measured based on earnings, while panel B shows skills measured based on having at least some college education, both measured shortly after arrival. Values for each age at migration group are based on the first time each group is observed in the labor market. Sources: 1980, 1990, and 2000 Census and 2009-2011 ACS.

Table WA17: OLS Regressions, Log Weekly Earnings, Educational Attainment, and English Language Proficiency, No YSM

|  | Log Earnings | | | Some College+ | | | English Very Well+ | | |
| --- | --- | --- | --- | --- | --- | --- | --- | --- | --- |
|  | (1) | (2) | (3) | (4) | (5) | (6) | (7) | (8) | (9) |
| Cohort: |  |  |  |  |  |  |  |  |  |
|  |  |  |  |  |  |  |  |  |  |
| 1960-1964 | 0.039** | -0.006 | 0.017 | 0.051*** | 0.006 | 0.040** | 0.047*** | 0.017*** | 0.025*** |
|  | (0.008) | (0.006) | (0.008) | (0.009) | (0.009) | (0.009) | (0.001) | (0.002) | (0.002) |
|  |  |  |  |  |  |  |  |  |  |
| 1970-1974 | -0.048*** | 0.049*** | 0.057*** | -0.042** | 0.056** | 0.068*** | -0.035*** | 0.036*** | 0.040*** |
|  | (0.008) | (0.007) | (0.006) | (0.008) | (0.013) | (0.011) | (0.001) | (0.005) | (0.004) |
|  |  |  |  |  |  |  |  |  |  |
| 1975-1979 | -0.049** | 0.068*** | 0.057** | -0.037 | 0.083** | 0.066** | -0.057*** | 0.022** | 0.018** |
|  | (0.015) | (0.012) | (0.014) | (0.016) | (0.021) | (0.019) | (0.002) | (0.006) | (0.005) |
|  |  |  |  |  |  |  |  |  |  |
| 1980-1984 | -0.122*** | 0.056* | 0.056* | -0.111*** | 0.069 | 0.071* | -0.100*** | 0.021 | 0.022* |
|  | (0.021) | (0.018) | (0.019) | (0.022) | (0.031) | (0.027) | (0.002) | (0.009) | (0.007) |
|  |  |  |  |  |  |  |  |  |  |
| 1985-1989 | -0.180*** | 0.016 | 0.015 | -0.165*** | 0.033 | 0.032 | -0.101*** | 0.030* | 0.030* |
|  | (0.025) | (0.021) | (0.025) | (0.025) | (0.035) | (0.032) | (0.005) | (0.011) | (0.010) |
|  |  |  |  |  |  |  |  |  |  |
| 1990-1994 | -0.190*** | -0.045 | -0.010 | -0.179*** | -0.031 | 0.020 | -0.097*** | -0.009 | 0.006 |
|  | (0.030) | (0.027) | (0.030) | (0.026) | (0.034) | (0.034) | (0.005) | (0.009) | (0.009) |
|  |  |  |  |  |  |  |  |  |  |
| 1995-1999 | -0.186*** | -0.034 | 0.002 | -0.224*** | -0.070 | -0.016 | -0.104*** | -0.015 | 0.002 |
|  | (0.030) | (0.027) | (0.031) | (0.032) | (0.038) | (0.039) | (0.012) | (0.014) | (0.015) |
|  |  |  |  |  |  |  |  |  |  |
| Parental Log Earnings |  | 0.695*** | 0.232*** |  | 0.705*** | 0.019 |  | 0.551*** | 0.340*** |
|  | (0.055) | (0.045) |  | (0.066) | (0.036) |  | (0.032) | (0.026) |
|  |  |  |  |  |  |  |  |  |  |
| Parent Some College+ |  |  | 0.589*** |  |  | 0.873*** |  |  | 0.268*** |
|  |  | (0.055) |  |  | (0.042) |  |  | (0.032) |
| Observations | 8,503,867 | 8,503,867 | 8,503,867 | 8,503,867 | 8,503,867 | 8,503,867 | 152,693 | 152,693 | 152,693 |
| R­2 | 0.040 | 0.041 | 0.041 | 0.039 | 0.042 | 0.043 | 0.118 | 0.201 | 0.208 |

Notes: Dependent variable is log weekly earnings in 2010 dollars in columns (1-3); in columns (4-9) it is binary, and equals one if the worker has at least some college education and zero otherwise (columns 4-6), and equals one if the worker reports speaking English very well or only English and zero otherwise (columns 7-9). Omitted category is the 1965-69 cohort. All specifications include a constant; columns (1-6) include survey year, age (introduced as a third-order polynomial) and fully interacted with survey year and immigrant status, and an immigrant dummy variable. Sources: 1980, 1990, and 2000 Census and 2009-2011 ACS. Standard errors in parentheses, and are clustered at the immigrant cohort level.

Table WA18: OLS Regressions, Log Weekly Earnings, Non-Mexico and Mexico

|  | (1) | (2) |
| --- | --- | --- |
|  | Non-Mexico | Mexico |
| Cohort: |  |  |
|  |  |  |
| 1960-1964 | 0.046*** | 0.044*** |
|  | (0.001) | (0.003) |
|  |  |  |
| 1970-1974 | 0.013*** | -0.006* |
|  | (0.001) | (0.003) |
|  |  |  |
| 1975-1979 | 0.056*** | -0.041*** |
|  | (0.002) | (0.005) |
|  |  |  |
| 1980-1984 | -0.022*** | -0.073*** |
|  | (0.002) | (0.006) |
|  |  |  |
| 1985-1989 | -0.063*** | -0.100*** |
|  | (0.006) | (0.007) |
|  |  |  |
| 1990-1994 | -0.057*** | -0.106*** |
|  | (0.007) | (0.009) |
|  |  |  |
| 1995-1999 | -0.103*** | -0.107*** |
|  | (0.012) | (0.007) |
|  |  |  |
| Age at Migration: |  |  |
|  |  |  |
| 4-8 | -0.017 | -0.063* |
|  | (0.014) | (0.025) |
|  |  |  |
| 9-13 | -0.066* | -0.154*** |
|  | (0.022) | (0.024) |
|  |  |  |
| 14-15 | -0.106** | -0.246*** |
|  | (0.030) | (0.027) |
|  |  |  |
| 16-17 | -0.138*** | -0.288*** |
|  | (0.026) | (0.019) |
| Observations | 8,447,945 | 8,407,096 |
| R­2 | 0.039 | 0.041 |

Notes: Dependent variable is log weekly earnings in 2010 dollars. Omitted categories are 1965-69 cohort and 0-3 age at migration. Column (1) includes only non-Mexican immigrants, while column (2) includes only Mexican immigrants, in addition to native workers (who appear in both estimations). All specifications include survey year, an immigrant dummy variable, age (introduced as a third-order polynomial) and fully interacted with survey year, years since migration, years since migration squared, and a constant. Sources: 1980, 1990, and 2000 Census and 2009-2011 ACS. Standard errors in parentheses, and are clustered at the immigrant cohort level.

Table WA19: OLS Regressions, Log Weekly Earnings, Educational Attainment, and English Language Proficiency, Parental Education Measured Using HS Grad+

|  | Log Earnings | | | Some College+ | | | English Very Well+ | | |
| --- | --- | --- | --- | --- | --- | --- | --- | --- | --- |
|  | (1) | (2) | (3) | (4) | (5) | (6) | (7) | (8) | (9) |
| Cohort: |  |  |  |  |  |  |  |  |  |
|  |  |  |  |  |  |  |  |  |  |
| 1960-1964 | 0.056*** | 0.018** | 0.031*** | 0.059*** | 0.020** | 0.041*** | 0.047*** | 0.017*** | 0.026*** |
|  | (0.001) | (0.004) | (0.002) | (0.001) | (0.004) | (0.002) | (0.001) | (0.002) | (0.002) |
|  |  |  |  |  |  |  |  |  |  |
| 1970-1974 | -0.039*** | 0.050*** | 0.058*** | -0.033*** | 0.058*** | 0.070*** | -0.035*** | 0.036*** | 0.041*** |
|  | (0.002) | (0.009) | (0.006) | (0.002) | (0.009) | (0.006) | (0.001) | (0.005) | (0.004) |
|  |  |  |  |  |  |  |  |  |  |
| 1975-1979 | -0.026*** | 0.074*** | 0.065*** | -0.013*** | 0.088*** | 0.074*** | -0.057*** | 0.022** | 0.016* |
|  | (0.002) | (0.010) | (0.006) | (0.002) | (0.011) | (0.007) | (0.002) | (0.006) | (0.005) |
|  |  |  |  |  |  |  |  |  |  |
| 1980-1984 | -0.080*** | 0.074** | 0.036** | -0.078*** | 0.078** | 0.020 | -0.100*** | 0.021 | -0.004 |
|  | (0.003) | (0.015) | (0.008) | (0.003) | (0.016) | (0.010) | (0.002) | (0.009) | (0.007) |
|  |  |  |  |  |  |  |  |  |  |
| 1985-1989 | -0.130*** | 0.035* | -0.002 | -0.121*** | 0.046* | -0.012 | -0.101*** | 0.030* | 0.005 |
|  | (0.004) | (0.015) | (0.008) | (0.006) | (0.018) | (0.013) | (0.005) | (0.011) | (0.009) |
|  |  |  |  |  |  |  |  |  |  |
| 1990-1994 | -0.128*** | -0.018 | -0.039*** | -0.125*** | -0.013 | -0.046** | -0.097*** | -0.009 | -0.023* |
|  | (0.004) | (0.010) | (0.006) | (0.006) | (0.014) | (0.010) | (0.005) | (0.009) | (0.008) |
|  |  |  |  |  |  |  |  |  |  |
| 1995-1999 | -0.142*** | -0.030* | -0.052*** | -0.167*** | -0.053* | -0.087** | -0.104*** | -0.015 | -0.029 |
|  | (0.009) | (0.012) | (0.010) | (0.017) | (0.019) | (0.019) | (0.012) | (0.014) | (0.013) |
|  |  |  |  |  |  |  |  |  |  |
| Parental Log Earnings |  | 0.696*** | 0.185** |  | 0.706*** | -0.085* |  | 0.551*** | 0.217*** |
|  | (0.056) | (0.048) |  | (0.066) | (0.032) |  | (0.032) | (0.033) |
|  |  |  |  |  |  |  |  |  |  |
| Parent HS+ |  |  | 0.585*** |  |  | 0.905*** |  |  | 0.382*** |
|  |  |  | (0.055) |  |  | (0.039) |  |  | (0.046) |
| Mean |  |  |  | 0.545 | 0.545 | 0.545 | 0.691 | 0.691 | 0.691 |
| Observations | 8,503,867 | 8,503,867 | 8,503,867 | 8,503,867 | 8,503,867 | 8,503,867 | 152,693 | 152,693 | 152,693 |
| R­2 | 0.040 | 0.041 | 0.041 | 0.039 | 0.042 | 0.043 | 0.118 | 0.201 | 0.218 |

Notes: Dependent variable is log weekly earnings in 2010 dollars in columns (1-3); in columns (4-9) it is binary, and equals one if the worker has at least some college education and zero otherwise (columns 4-6), and equals one if the worker reports speaking English very well or only English and zero otherwise (columns 7-9). Omitted category is the 1965-69 cohort. All specifications include years since migration, years since migration squared, and a constant; columns (1-6) include survey year, age (introduced as a third-order polynomial) and fully interacted with survey year, and an immigrant dummy variable. Row “Mean” shows the mean of the dependent variable. Sources: 1980, 1990, and 2000 Census and 2009-2011 ACS. Standard errors in parentheses, and are clustered at the immigrant cohort level.

Table WA20: OLS Regressions, Log Weekly Earnings, Educational Attainment, and English Language Proficiency, Parental Education Measured Using College Grad+

|  | Log Earnings | | | Some College+ | | | English Very Well+ | | |
| --- | --- | --- | --- | --- | --- | --- | --- | --- | --- |
|  | (1) | (2) | (3) | (4) | (5) | (6) | (7) | (8) | (9) |
| Cohort: |  |  |  |  |  |  |  |  |  |
|  |  |  |  |  |  |  |  |  |  |
| 1960-1964 | 0.056*** | 0.018** | 0.034*** | 0.059*** | 0.020** | 0.041*** | 0.047*** | 0.017*** | 0.022*** |
|  | (0.001) | (0.004) | (0.002) | (0.001) | (0.004) | (0.002) | (0.001) | (0.002) | (0.002) |
|  |  |  |  |  |  |  |  |  |  |
| 1970-1974 | -0.039*** | 0.050*** | 0.041*** | -0.033*** | 0.058*** | 0.045*** | -0.035*** | 0.036*** | 0.033*** |
|  | (0.002) | (0.009) | (0.006) | (0.002) | (0.009) | (0.005) | (0.001) | (0.005) | (0.004) |
|  |  |  |  |  |  |  |  |  |  |
| 1975-1979 | -0.026*** | 0.074*** | 0.058*** | -0.013*** | 0.088*** | 0.067*** | -0.057*** | 0.022** | 0.017* |
|  | (0.002) | (0.010) | (0.006) | (0.002) | (0.011) | (0.006) | (0.002) | (0.006) | (0.005) |
|  |  |  |  |  |  |  |  |  |  |
| 1980-1984 | -0.080*** | 0.074** | 0.043** | -0.078*** | 0.078** | 0.037** | -0.100*** | 0.021 | 0.012 |
|  | (0.003) | (0.015) | (0.009) | (0.003) | (0.016) | (0.010) | (0.002) | (0.009) | (0.008) |
|  |  |  |  |  |  |  |  |  |  |
| 1985-1989 | -0.130*** | 0.035* | -0.001 | -0.121*** | 0.046* | -0.002 | -0.101*** | 0.030* | 0.019 |
|  | (0.004) | (0.015) | (0.009) | (0.006) | (0.018) | (0.013) | (0.005) | (0.011) | (0.010) |
|  |  |  |  |  |  |  |  |  |  |
| 1990-1994 | -0.128*** | -0.018 | -0.040*** | -0.125*** | -0.013 | -0.042** | -0.097*** | -0.009 | -0.015 |
|  | (0.004) | (0.010) | (0.007) | (0.006) | (0.014) | (0.011) | (0.005) | (0.009) | (0.009) |
|  |  |  |  |  |  |  |  |  |  |
| 1995-1999 | -0.142*** | -0.030* | -0.049** | -0.167*** | -0.053* | -0.079** | -0.104*** | -0.015 | -0.020 |
|  | (0.009) | (0.012) | (0.011) | (0.017) | (0.019) | (0.018) | (0.012) | (0.014) | (0.014) |
|  |  |  |  |  |  |  |  |  |  |
| Parental Log Earnings |  | 0.696*** | 0.329*** |  | 0.706*** | 0.215** |  | 0.551*** | 0.448*** |
|  | (0.056) | (0.038) |  | (0.066) | (0.047) |  | (0.032) | (0.028) |
|  |  |  |  |  |  |  |  |  |  |
| Parent College Grad+ |  |  | 0.602*** |  |  | 0.806*** |  |  | 0.168*** |
|  |  | (0.037) |  |  | (0.030) |  |  | (0.021) |
| Mean |  |  | 6.826 | 0.545 | 0.545 | 0.545 | 0.691 | 0.691 | 0.691 |
| Observations | 8,503,867 | 8,503,867 | 8,503,867 | 8,503,867 | 8,503,867 | 8,503,867 | 152,693 | 152,693 | 152,693 |
| R­2 | 0.040 | 0.041 | 0.041 | 0.039 | 0.042 | 0.043 | 0.118 | 0.201 | 0.203 |

Notes: Dependent variable is log weekly earnings in 2010 dollars in columns (1-3); in columns (4-9) it is binary, and equals one if the worker has at least some college education and zero otherwise (columns 4-6), and equals one if the worker reports speaking English very well or only English and zero otherwise (columns 7-9). Omitted category is the 1965-69 cohort. All specifications include years since migration, years since migration squared, and a constant; columns (1-6) include survey year, age (introduced as a third-order polynomial) and fully interacted with survey year, and an immigrant dummy variable. Row “Mean” shows the mean of the dependent variable. Sources: 1980, 1990, and 2000 Census and 2009-2011 ACS. Standard errors in parentheses, and are clustered at the immigrant cohort level.

Table WA21: OLS Regressions, Log Weekly Earnings, Educational Attainment, and English Language Proficiency, with Log GDP Per Capita of Parental Birthplace

|  | Log Earnings | | | Some College+ | | | English Very Well+ | | |
| --- | --- | --- | --- | --- | --- | --- | --- | --- | --- |
|  | (1) | (2) | (3) | (4) | (5) | (6) | (7) | (8) | (9) |
| Cohort: |  |  |  |  |  |  |  |  |  |
|  |  |  |  |  |  |  |  |  |  |
| 1970-1974 | -0.016* | -0.009 | -0.006 | -0.020*** | -0.008** | -0.003* | 0.024*** | 0.028*** | 0.026*** |
|  | (0.005) | (0.005) | (0.003) | (0.002) | (0.001) | (0.001) | (0.002) | (0.002) | (0.001) |
|  |  |  |  |  |  |  |  |  |  |
| 1980-1984 | -0.054*** | -0.053*** | 0.018* | -0.066*** | -0.064*** | 0.011** | -0.042*** | -0.042*** | 0.013** |
|  | (0.003) | (0.003) | (0.006) | (0.002) | (0.002) | (0.003) | (0.002) | (0.001) | (0.003) |
|  |  |  |  |  |  |  |  |  |  |
| 1985-1989 | -0.104*** | -0.095*** | -0.021 | -0.107*** | -0.092*** | -0.015 | -0.043*** | -0.039*** | 0.021* |
|  | (0.006) | (0.006) | (0.008) | (0.005) | (0.006) | (0.007) | (0.003) | (0.004) | (0.006) |
|  |  |  |  |  |  |  |  |  |  |
| 1990-1994 | -0.107*** | -0.097*** | -0.052*** | -0.115*** | -0.099*** | -0.049*** | -0.038*** | -0.034*** | -0.008 |
|  | (0.005) | (0.005) | (0.009) | (0.006) | (0.007) | (0.007) | (0.003) | (0.004) | (0.006) |
|  |  |  |  |  |  |  |  |  |  |
| 1995-1999 | -0.122*** | -0.110*** | -0.059*** | -0.151*** | -0.132** | -0.074* | -0.047* | -0.042* | -0.011 |
|  | (0.009) | (0.009) | (0.010) | (0.025) | (0.026) | (0.023) | (0.014) | (0.015) | (0.014) |
|  |  |  |  |  |  |  |  |  |  |
| Log Parental GDP Per Cap. |  | -0.071*** | -0.009 |  | -0.118*** | -0.047** |  | -0.033* | 0.001 |
|  | (0.005) | (0.012) |  | (0.005) | (0.013) |  | (0.011) | (0.012) |
|  |  |  |  |  |  |  |  |  |  |
| Parent Log Earnings |  |  | 0.148** |  |  | 0.090** |  |  | 0.258*** |
|  |  | (0.036) |  |  | (0.023) |  |  | (0.015) |
|  |  |  |  |  |  |  |  |  |  |
| Parent Some College+ |  |  | 0.682*** |  |  | 0.786*** |  |  | 0.355*** |
|  |  | (0.050) |  |  | (0.029) |  |  | (0.034) |
| Mean |  |  |  | 0.545 | 0.545 | 0.545 | 0.643 | 0.643 | 0.642 |
| Observations | 8,455,233 | 8,455,233 | 8,455,183 | 8,455,233 | 8,455,233 | 8,455,183 | 104,059 | 104,059 | 104,009 |
| R­2 | 0.040 | 0.040 | 0.041 | 0.039 | 0.040 | 0.043 | 0.107 | 0.111 | 0.198 |

Notes: Dependent variable is log weekly earnings in 2010 dollars in columns (1-3); in columns (4-9) it is binary, and equals one if the worker has at least some college education and zero otherwise (columns 4-6), and equals one if the worker reports speaking English very well or only English and zero otherwise (columns 7-9). Omitted category is the 1965-69 cohort. All specifications include years since migration, years since migration squared, and a constant; columns (1-6) include survey year, age (introduced as a third-order polynomial) and fully interacted with survey year, and an immigrant dummy variable. Row “Mean” shows the mean of the dependent variable. Sources: 1980, 1990, and 2000 Census and 2009-2011 ACS. Standard errors in parentheses, and are clustered at the immigrant cohort level.

Table WA22: OLS Regressions, Log Weekly Earnings, Educational Attainment, and English Language Proficiency, with Log of Parental Cohort Size

|  | Log Earnings | | | Some College+ | | | English Very Well+ | | |
| --- | --- | --- | --- | --- | --- | --- | --- | --- | --- |
|  | (1) | (2) | (3) | (4) | (5) | (6) | (7) | (8) | (9) |
| Cohort: |  |  |  |  |  |  |  |  |  |
|  |  |  |  |  |  |  |  |  |  |
| 1960-1964 | 0.056*** | 0.058*** | 0.038*** | 0.059*** | 0.061*** | 0.049*** | 0.047*** | 0.049*** | 0.029*** |
|  | (0.001) | (0.001) | (0.002) | (0.001) | (0.001) | (0.002) | (0.001) | (0.001) | (0.002) |
|  |  |  |  |  |  |  |  |  |  |
| 1970-1974 | -0.039*** | 0.061*** | 0.070*** | -0.033*** | 0.078*** | 0.085*** | -0.035*** | 0.049*** | 0.056*** |
|  | (0.002) | (0.010) | (0.008) | (0.002) | (0.009) | (0.007) | (0.001) | (0.007) | (0.005) |
|  |  |  |  |  |  |  |  |  |  |
| 1975-1979 | -0.026*** | 0.071*** | 0.074*** | -0.013*** | 0.094*** | 0.087*** | -0.057*** | 0.023* | 0.032*** |
|  | (0.002) | (0.009) | (0.007) | (0.002) | (0.009) | (0.007) | (0.002) | (0.007) | (0.005) |
|  |  |  |  |  |  |  |  |  |  |
| 1980-1984 | -0.080*** | 0.096*** | 0.093*** | -0.078*** | 0.117*** | 0.104*** | -0.100*** | 0.046** | 0.051** |
|  | (0.003) | (0.016) | (0.012) | (0.003) | (0.015) | (0.012) | (0.002) | (0.012) | (0.009) |
|  |  |  |  |  |  |  |  |  |  |
| 1985-1989 | -0.130*** | 0.064** | 0.055** | -0.121*** | 0.094*** | 0.073** | -0.101*** | 0.061** | 0.062*** |
|  | (0.004) | (0.016) | (0.012) | (0.006) | (0.017) | (0.014) | (0.005) | (0.014) | (0.011) |
|  |  |  |  |  |  |  |  |  |  |
| 1990-1994 | -0.128*** | 0.123*** | 0.049* | -0.125*** | 0.153*** | 0.081** | -0.097*** | 0.113*** | 0.060** |
|  | (0.004) | (0.020) | (0.017) | (0.006) | (0.021) | (0.019) | (0.005) | (0.017) | (0.016) |
|  |  |  |  |  |  |  |  |  |  |
| 1995-1999 | -0.142*** | 0.114*** | 0.041* | -0.167*** | 0.117** | 0.046 | -0.104*** | 0.110** | 0.057* |
|  | (0.009) | (0.019) | (0.017) | (0.017) | (0.025) | (0.023) | (0.012) | (0.022) | (0.019) |
|  |  |  |  |  |  |  |  |  |  |
| Log Parent Cohort Size |  | -0.119*** | -0.021* |  | -0.131*** | -0.028* |  | -0.099*** | -0.035** |
|  | (0.010) | (0.008) |  | (0.010) | (0.009) |  | (0.007) | (0.008) |
|  |  |  |  |  |  |  |  |  |  |
| Parental Log Earnings |  |  | 0.194** |  |  | -0.029 |  |  | 0.281*** |
|  |  | (0.052) |  |  | (0.052) |  |  | (0.045) |
|  |  |  |  |  |  |  |  |  |  |
| Parent Some College+ |  |  | 0.560*** |  |  | 0.830*** |  |  | 0.214*** |
|  |  | (0.052) |  |  | (0.033) |  |  | (0.025) |
| Mean |  |  |  | 0.545 | 0.545 | 0.545 | 0.691 | 0.691 | 0.691 |
| Observations | 8,503,867 | 8,503,867 | 8,503,867 | 8,503,867 | 8,503,867 | 8,503,867 | 152,693 | 152,693 | 152,693 |
| R­2 | 0.040 | 0.041 | 0.041 | 0.039 | 0.041 | 0.043 | 0.118 | 0.178 | 0.212 |

Notes: Dependent variable is log weekly earnings in 2010 dollars in columns (1-3); in columns (4-9) it is binary, and equals one if the worker has at least some college education and zero otherwise (columns 4-6), and equals one if the worker reports speaking English very well or only English and zero otherwise (columns 7-9). Omitted category is the 1965-69 cohort. All specifications include years since migration, years since migration squared, and a constant; columns (1-6) include survey year, age (introduced as a third-order polynomial) and fully interacted with survey year, and an immigrant dummy variable. Row “Mean” shows the mean of the dependent variable. Sources: 1980, 1990, and 2000 Census and 2009-2011 ACS. Standard errors in parentheses, and are clustered at the immigrant cohort level.

Table WA23: OLS Regressions, Log Weekly Earnings, Educational Attainment, and English Language Proficiency, Pre-Census Cohorts Only

|  | Log Earnings | | | Some College+ | | | English Very Well+ | | |
| --- | --- | --- | --- | --- | --- | --- | --- | --- | --- |
|  | (1) | (2) | (3) | (4) | (5) | (6) | (7) | (8) | (9) |
| Cohort: |  |  |  |  |  |  |  |  |  |
|  |  |  |  |  |  |  |  |  |  |
| 1975-1979 | -0.025* | 0.068* | 0.062** | -0.010* | 0.081** | 0.072*** | -0.055*** | 0.019 | 0.015 |
|  | (0.007) | (0.018) | (0.010) | (0.002) | (0.014) | (0.003) | (0.002) | (0.009) | (0.006) |
|  |  |  |  |  |  |  |  |  |  |
| 1985-1989 | -0.131*** | 0.015 | 0.021 | -0.118*** | 0.024 | 0.034* | -0.097*** | 0.019 | 0.022 |
|  | (0.008) | (0.026) | (0.016) | (0.005) | (0.022) | (0.011) | (0.003) | (0.014) | (0.012) |
|  |  |  |  |  |  |  |  |  |  |
| 1995-1999 | -0.145*** | -0.072* | -0.007 | -0.164** | -0.092* | 0.000 | -0.095** | -0.037 | -0.004 |
|  | (0.005) | (0.016) | (0.018) | (0.023) | (0.024) | (0.024) | (0.012) | (0.015) | (0.018) |
|  |  |  |  |  |  |  |  |  |  |
| Parent Log Earnings |  | 0.706*** | 0.220* |  | 0.690** | -0.003 |  | 0.561** | 0.314* |
|  | (0.081) | (0.052) |  | (0.100) | (0.045) |  | (0.058) | (0.057) |
|  |  |  |  |  |  |  |  |  |  |
| Parent Some College+ |  |  | 0.638** |  |  | 0.908*** |  |  | 0.324* |
|  |  | (0.107) |  |  | (0.077) |  |  | (0.079) |
| Mean |  |  |  | 0.545 | 0.545 | 0.545 | 0.669 | 0.669 | 0.669 |
| Observations | 8,425,009 | 8,425,009 | 8,425,009 | 8,425,009 | 8,425,009 | 8,425,009 | 73,858 | 73,835 | 73,835 |
| R­2 | 0.039 | 0.040 | 0.040 | 0.039 | 0.040 | 0.041 | 0.126 | 0.205 | 0.218 |

Notes: Dependent variable is log weekly earnings in 2010 dollars in columns (1-3); in columns (4-9) it is binary, and equals one if the worker has at least some college education and zero otherwise (columns 4-6), and equals one if the worker reports speaking English very well or only English and zero otherwise (columns 7-9). Omitted category is the 1965-69 cohort. All specifications include years since migration, years since migration squared, and a constant; columns (1-6) include survey year, age (introduced as a third-order polynomial) and fully interacted with survey year, and an immigrant dummy variable. Row “Mean” shows the mean of the dependent variable. Sources: 1980, 1990, and 2000 Census and 2009-2011 ACS. Standard errors in parentheses, and are clustered at the immigrant cohort level.

Table WA24: OLS Regressions, Log Weekly Earnings, Educational Attainment, and English Language Proficiency, Pre-Census Cohorts Only, Parents with Children Only

|  | Log Earnings | | | Some College+ | | | English Very Well+ | | |
| --- | --- | --- | --- | --- | --- | --- | --- | --- | --- |
|  | (1) | (2) | (3) | (4) | (5) | (6) | (7) | (8) | (9) |
| Cohort: |  |  |  |  |  |  |  |  |  |
|  |  |  |  |  |  |  |  |  |  |
| 1975-1979 | -0.025* | 0.042* | 0.047* | -0.010* | 0.057** | 0.064*** | -0.055*** | 0.001 | 0.004 |
|  | (0.007) | (0.014) | (0.010) | (0.002) | (0.007) | (0.003) | (0.002) | (0.006) | (0.006) |
|  |  |  |  |  |  |  |  |  |  |
| 1985-1989 | -0.130*** | -0.009 | -0.011 | -0.118*** | 0.003 | 0.001 | -0.097*** | 0.004 | 0.004 |
|  | (0.008) | (0.021) | (0.013) | (0.005) | (0.013) | (0.010) | (0.003) | (0.011) | (0.010) |
|  |  |  |  |  |  |  |  |  |  |
| 1995-1999 | -0.145*** | -0.085** | -0.030 | -0.164** | -0.104** | -0.025 | -0.095** | -0.045* | -0.014 |
|  | (0.005) | (0.015) | (0.016) | (0.023) | (0.021) | (0.026) | (0.012) | (0.013) | (0.019) |
|  |  |  |  |  |  |  |  |  |  |
| Parent Log Earnings |  | 0.632*** | 0.148 |  | 0.629*** | -0.060 |  | 0.527** | 0.257** |
|  | (0.056) | (0.056) |  | (0.057) | (0.039) |  | (0.047) | (0.039) |
|  |  |  |  |  |  |  |  |  |  |
| Parent Some College+ |  |  | 0.659** |  |  | 0.937*** |  |  | 0.369* |
|  |  | (0.115) |  |  | (0.072) |  |  | (0.093) |
| Mean |  |  |  | 0.545 | 0.545 | 0.545 | 0.669 | 0.669 | 0.669 |
| Observations | 8,424,999 | 8,424,999 | 8,424,999 | 8,424,999 | 8,424,999 | 8,424,999 | 73,825 | 73,825 | 73,825 |
| R­2 | 0.039 | 0.040 | 0.040 | 0.039 | 0.040 | 0.041 | 0.126 | 0.199 | 0.215 |

Notes: Dependent variable is log weekly earnings in 2010 dollars in columns (1-3); in columns (4-9) it is binary, and equals one if the worker has at least some college education and zero otherwise (columns 4-6), and equals one if the worker reports speaking English very well or only English and zero otherwise (columns 7-9). Omitted category is the 1965-69 cohort. All specifications include years since migration, years since migration squared, and a constant; columns (1-6) include survey year, age (introduced as a third-order polynomial) and fully interacted with survey year, and an immigrant dummy variable. Row “Mean” shows the mean of the dependent variable. Sources: 1980, 1990, and 2000 Census and 2009-2011 ACS. Standard errors in parentheses, and are clustered at the immigrant cohort level.

Table WA25: OLS Regressions, Log Weekly Earnings, Educational Attainment, and English Language Proficiency, Pre-Census Cohorts Only, Parents with Children Only, Number of Children

|  | Log Earnings | | | Some College+ | | | English Very Well+ | | |
| --- | --- | --- | --- | --- | --- | --- | --- | --- | --- |
|  | (1) | (2) | (3) | (4) | (5) | (6) | (7) | (8) | (9) |
| Cohort: |  |  |  |  |  |  |  |  |  |
|  |  |  |  |  |  |  |  |  |  |
| 1975-1979 | -0.025* | -0.011 | 0.041* | -0.010* | 0.004* | 0.061*** | -0.055*** | -0.043*** | -0.005 |
|  | (0.007) | (0.007) | (0.014) | (0.002) | (0.001) | (0.006) | (0.002) | (0.002) | (0.008) |
|  |  |  |  |  |  |  |  |  |  |
| 1985-1989 | -0.130*** | -0.206*** | -0.049 | -0.118*** | -0.191*** | -0.016 | -0.097*** | -0.163*** | -0.049 |
|  | (0.008) | (0.010) | (0.037) | (0.004) | (0.003) | (0.026) | (0.003) | (0.004) | (0.020) |
|  |  |  |  |  |  |  |  |  |  |
| 1995-1999 | -0.145*** | -0.296*** | -0.084 | -0.164** | -0.311*** | -0.049 | -0.095** | -0.227*** | -0.089 |
|  | (0.005) | (0.014) | (0.050) | (0.023) | (0.011) | (0.040) | (0.012) | (0.007) | (0.031) |
|  |  |  |  |  |  |  |  |  |  |
| Parent Number Children |  | -0.354*** | -0.098 |  | -0.345*** | -0.043 |  | -0.311** | -0.134** |
|  | (0.020) | (0.062) |  | (0.029) | (0.066) |  | (0.025) | (0.022) |
|  |  |  |  |  |  |  |  |  |  |
| Parent Log Earnings |  |  | 0.094* |  |  | -0.084** |  |  | 0.182** |
|  |  | (0.022) |  |  | (0.014) |  |  | (0.029) |
|  |  |  |  |  |  |  |  |  |  |
| Parent Some College+ |  |  | 0.609* |  |  | 0.915*** |  |  | 0.301 |
|  |  | (0.138) |  |  | (0.100) |  |  | (0.099) |
| Mean |  |  |  | 0.545 | 0.545 | 0.545 | 0.669 | 0.669 | 0.669 |
| Observations | 8,424,999 | 8,424,999 | 8,424,999 | 8,425,032 | 8,424,999 | 8,424,999 | 73,825 | 73,825 | 73,825 |
| R­2 | 0.039 | 0.040 | 0.040 | 0.039 | 0.040 | 0.041 | 0.126 | 0.190 | 0.222 |

Notes: Dependent variable is log weekly earnings in 2010 dollars in columns (1-3); in columns (4-9) it is binary, and equals one if the worker has at least some college education and zero otherwise (columns 4-6), and equals one if the worker reports speaking English very well or only English and zero otherwise (columns 7-9). Omitted category is the 1965-69 cohort. All specifications include years since migration, years since migration squared, and a constant; columns (1-6) include survey year, age (introduced as a third-order polynomial) and fully interacted with survey year, and an immigrant dummy variable. Row “Mean” shows the mean of the dependent variable. Sources: 1980, 1990, and 2000 Census and 2009-2011 ACS. Standard errors in parentheses, and are clustered at the immigrant cohort level.

Table WA26: OLS Regressions, Log Weekly Earnings, Educational Attainment and English Proficiency, With State Controls

|  | Log Earnings | | Some College+ | | English Very Well+ | |
| --- | --- | --- | --- | --- | --- | --- |
|  | (1) | (2) | (3) | (4) | (5) | (6) |
| Cohort: |  |  |  |  |  |  |
|  |  |  |  |  |  |  |
| 1960-1964 | 0.056*** | 0.063*** | 0.059*** | 0.059*** | 0.047*** | 0.048*** |
|  | (0.001) | (0.001) | (0.001) | (0.001) | (0.001) | (0.001) |
|  |  |  |  |  |  |  |
| 1970-1974 | -0.039*** | -0.046*** | -0.033*** | -0.039*** | -0.035*** | -0.017*** |
|  | (0.002) | (0.002) | (0.002) | (0.002) | (0.001) | (0.002) |
|  |  |  |  |  |  |  |
| 1975-1979 | -0.026*** | -0.034*** | -0.013*** | -0.023*** | -0.057*** | -0.028*** |
|  | (0.002) | (0.003) | (0.002) | (0.002) | (0.002) | (0.004) |
|  |  |  |  |  |  |  |
| 1980-1984 | -0.080*** | -0.080*** | -0.078*** | -0.082*** | -0.100*** | -0.076*** |
|  | (0.003) | (0.003) | (0.003) | (0.003) | (0.002) | (0.004) |
|  |  |  |  |  |  |  |
| 1985-1989 | -0.130*** | -0.133*** | -0.121*** | -0.124*** | -0.101*** | -0.080*** |
|  | (0.004) | (0.005) | (0.006) | (0.006) | (0.005) | (0.006) |
|  |  |  |  |  |  |  |
| 1990-1994 | -0.128*** | -0.119*** | -0.125*** | -0.118*** | -0.097*** | -0.079*** |
|  | (0.004) | (0.005) | (0.006) | (0.007) | (0.005) | (0.006) |
|  |  |  |  |  |  |  |
| 1995-1999 | -0.142*** | -0.114*** | -0.167*** | -0.146*** | -0.104*** | -0.094*** |
|  | (0.009) | (0.010) | (0.017) | (0.018) | (0.012) | (0.014) |
|  |  |  |  |  |  |  |
| Age at Migration: |  |  |  |  |  |  |
|  |  |  |  |  |  |  |
| 4-8 | -0.011 | -0.015* | 0.005 | 0.004 | -0.001 | -0.006 |
|  | (0.006) | (0.005) | (0.009) | (0.009) | (0.009) | (0.009) |
|  |  |  |  |  |  |  |
| 9-13 | -0.073*** | -0.077*** | -0.042** | -0.043*** | -0.070*** | -0.078*** |
|  | (0.011) | (0.008) | (0.009) | (0.008) | (0.012) | (0.012) |
|  |  |  |  |  |  |  |
| 14-15 | -0.159*** | -0.164*** | -0.140*** | -0.143*** | -0.213*** | -0.217*** |
|  | (0.021) | (0.019) | (0.011) | (0.011) | (0.021) | (0.020) |
|  |  |  |  |  |  |  |
| 16-17 | -0.222*** | -0.227*** | -0.205*** | -0.209*** | -0.309*** | -0.307*** |
|  | (0.022) | (0.021) | (0.012) | (0.012) | (0.025) | (0.024) |
|  |  |  |  |  |  |  |
| State | No | Yes | No | Yes | No | Yes |
| Mean |  |  | 0.545 | 0.545 | 0.691 | 0.691 |
| Observations | 8,503,867 | 8,503,867 | 8,503,867 | 8,503,867 | 152,693 | 152,693 |
| R­2 | 0.040 | 0.059 | 0.039 | 0.058 | 0.118 | 0.146 |

Notes: Dependent variable is log weekly earnings in 2010 dollars in columns (1-2); in columns (3-6) it is binary, and equals one if the worker has at least some college education and zero otherwise (columns 3-4), and equals one if the worker reports speaking English very well or only English and zero otherwise (columns 5-6). Omitted category is the 1965-69 cohort and 0-3 age at migration. All specifications include years since migration, years since migration squared, and a constant; columns (1-4) include survey year, age (introduced as a third-order polynomial) and fully interacted with survey year, and an immigrant dummy variable. Row “Mean” shows the mean of the dependent variable. Sources: 1980, 1990, and 2000 Census and 2009-2011 ACS. Standard errors in parentheses, and are clustered at the immigrant cohort level.

1. I am also required to limit my analysis to a smaller list of countries with reliable GDP measures, although I am able to assign GDP values for the vast majority of childhood immigrants. I would like to thank George Borjas for providing GDP data used in this analysis, which are derived from the Penn World Table. [↑](#footnote-ref-1)
